# Supplementary material for: Characterization of Polysaccharide A Response Reveals Interferon Responsive Gene Signature and Immunomodulatory Marker Expression
Source: Front Immunol. 2020 Oct 26;11:556813. doi: 10.3389/fimmu.2020.556813 (PMC7649347; doi:10.3389/fimmu.2020.556813)
Supplement: Supplementary Table 1 — List of top 500 DEGs with p values. Complete list of the top 500 differentially expressed genes in CD4+ cells stimulated for 7 days with PSA. [file Table_1.xlsx]

## Sheet: Sheet1
Gene ID	symbol	PValue	FDR	biotype
ENSMUSG00000003545	Fosb	0	0	protein_coding
ENSMUSG00000084349	Rpl3-ps1	0	0	pseudogene
ENSMUSG00000018916	Csf2	1.86784e-279	1.16503e-275	protein_coding
ENSMUSG00000045573	Penk	2.60171e-236	1.21708e-232	protein_coding
ENSMUSG00000021250	Fos	2.52961e-226	9.46681e-223	protein_coding
ENSMUSG00000026360	Rgs2	7.39379e-213	2.30588e-209	protein_coding
ENSMUSG00000020926	Adam11	3.09653e-193	8.27747e-190	protein_coding
ENSMUSG00000082209	Eif4a-ps4	3.14919e-183	7.36596e-180	pseudogene
ENSMUSG00000020702	Ccl1	2.06207e-181	4.28727e-178	protein_coding
ENSMUSG00000040435	Ppp1r15a	8.53532e-181	1.59713e-177	protein_coding
ENSMUSG00000023456	Tpi1	4.22116e-176	7.18058e-173	protein_coding
ENSMUSG00000015437	Gzmb	5.48812e-175	8.5578e-172	protein_coding
ENSMUSG00000043483	Gm6863	3.12076e-172	4.49198e-169	pseudogene
ENSMUSG00000024190	Dusp1	5.77052e-172	7.71271e-169	protein_coding
ENSMUSG00000025491	Ifitm1	8.51242e-168	1.00566e-164	protein_coding
ENSMUSG00000026628	Atf3	8.59903e-168	1.00566e-164	protein_coding
ENSMUSG00000048440	Cyp4f16	2.91524e-165	3.20882e-162	protein_coding
ENSMUSG00000079850	Amy2a2	1.24382e-156	1.29302e-153	protein_coding
ENSMUSG00000073421	H2-Ab1	2.5989e-156	2.55951e-153	protein_coding
ENSMUSG00000030789	Itgax	1.57727e-154	1.4757e-151	protein_coding
ENSMUSG00000062070	Pgk1	8.89014e-154	7.92154e-151	protein_coding
ENSMUSG00000023034	Nr4a1	4.8384e-153	4.11528e-150	protein_coding
ENSMUSG00000018476	Kdm6b	5.05066e-152	4.10904e-149	protein_coding
ENSMUSG00000052160	Pld4	7.56978e-152	5.9019e-149	protein_coding
ENSMUSG00000055148	Klf2	1.65949e-148	1.24209e-145	protein_coding
ENSMUSG00000017493	Igfbp4	1.0246e-147	7.37395e-145	protein_coding
ENSMUSG00000081344	Gm14303	4.17113e-145	2.89075e-142	pseudogene
ENSMUSG00000003134	Tbc1d8	1.26956e-144	8.48429e-142	protein_coding
ENSMUSG00000028965	Tnfrsf9	2.39977e-144	1.54843e-141	protein_coding
ENSMUSG00000079139	Gm4204	2.34889e-139	1.46508e-136	pseudogene
ENSMUSG00000024042	Sik1	3.62892e-137	2.19046e-134	protein_coding
ENSMUSG00000053477	Tcf4	2.8016e-135	1.63824e-132	protein_coding
ENSMUSG00000031431	Tsc22d3	1.43496e-134	8.13665e-132	protein_coding
ENSMUSG00000022010	Tsc22d1	8.25483e-134	4.54307e-131	protein_coding
ENSMUSG00000023132	Gzma	1.62372e-133	8.68089e-131	protein_coding
ENSMUSG00000026170	Cyp27a1	6.68121e-133	3.47274e-130	protein_coding
ENSMUSG00000060586	H2-Eb1	2.66127e-132	1.34588e-129	protein_coding
ENSMUSG00000079186	Gzmc	9.21531e-132	4.53781e-129	protein_coding
ENSMUSG00000075010	AW112010	1.09341e-128	5.24611e-126	protein_coding
ENSMUSG00000051504	Siglech	6.69707e-128	3.13289e-125	protein_coding
ENSMUSG00000063229	Ldha	5.73455e-127	2.61719e-124	protein_coding
ENSMUSG00000030214	Plbd1	6.23479e-127	2.77775e-124	protein_coding
ENSMUSG00000069917	Hba-a2	2.34997e-125	1.02262e-122	protein_coding
ENSMUSG00000044786	Zfp36	8.64998e-124	3.6786e-121	protein_coding
ENSMUSG00000066278	Vps37b	4.03888e-123	1.67945e-120	protein_coding
ENSMUSG00000020893	Per1	3.34478e-122	1.3606e-119	protein_coding
ENSMUSG00000039384	Dusp10	1.60556e-121	6.39218e-119	protein_coding
ENSMUSG00000031779	Ccl22	7.30293e-121	2.84693e-118	protein_coding
ENSMUSG00000036594	H2-Aa	3.09503e-120	1.18192e-117	protein_coding
ENSMUSG00000000318	Clec10a	1.4225e-118	5.32356e-116	protein_coding
ENSMUSG00000040026	Saa3	3.42196e-118	1.25552e-115	protein_coding
ENSMUSG00000036931	Nfkbid	5.94593e-116	2.13962e-113	protein_coding
ENSMUSG00000053310	Nrgn	8.03944e-115	2.83838e-112	protein_coding
ENSMUSG00000031495	Cd209d	1.00532e-114	3.48361e-112	protein_coding
ENSMUSG00000042817	Flt3	3.10258e-114	1.05556e-111	protein_coding
ENSMUSG00000055170	Ifng	3.37285e-112	1.12701e-109	protein_coding
ENSMUSG00000082099	Gm12013	1.18166e-110	3.87915e-108	pseudogene
ENSMUSG00000020649	Rrm2	1.78254e-109	5.75085e-107	protein_coding
ENSMUSG00000042249	Adrbk2	9.14807e-109	2.90133e-106	protein_coding
ENSMUSG00000078922	Tgtp1	1.07714e-108	3.35925e-106	protein_coding
ENSMUSG00000028270	Gbp2	1.63602e-108	5.01855e-106	protein_coding
ENSMUSG00000031762	Mt2	3.58519e-108	1.08203e-105	protein_coding
ENSMUSG00000052684	Jun	1.28828e-107	3.82641e-105	protein_coding
ENSMUSG00000011752	Pgam1	7.79746e-106	2.27978e-103	protein_coding
ENSMUSG00000044138	Sirpb1a	9.80203e-105	2.82178e-102	protein_coding
ENSMUSG00000022540	Rogdi	2.0977e-104	5.94729e-102	protein_coding
ENSMUSG00000029603	Dtx1	2.88228e-104	7.94042e-102	protein_coding
ENSMUSG00000029816	Gpnmb	2.88557e-104	7.94042e-102	protein_coding
ENSMUSG00000042507	C130039O16Rik	2.40928e-103	6.5337e-101	protein_coding
ENSMUSG00000046546	Fam43a	3.72825e-103	9.96614e-101	protein_coding
ENSMUSG00000026770	Il2ra	9.43424e-103	2.48639e-100	protein_coding
ENSMUSG00000040204	2810417H13Rik	1.12863e-102	2.9332e-100	protein_coding
ENSMUSG00000052837	Junb	1.22453e-102	3.13882e-100	protein_coding
ENSMUSG00000068220	Lgals1	2.75245e-102	6.95997e-100	protein_coding
ENSMUSG00000039191	Rbpj	4.67431e-102	1.16621e-99	protein_coding
ENSMUSG00000028874	Fgr	1.02037e-101	2.51226e-99	protein_coding
ENSMUSG00000025203	Scd2	2.845e-101	6.91373e-99	protein_coding
ENSMUSG00000050335	Lgals3	6.99426e-101	1.6779e-98	protein_coding
ENSMUSG00000008384	Sertad1	1.10684e-100	2.62167e-98	protein_coding
ENSMUSG00000093059	AL589767.1	3.74252e-99	8.75375e-97	misc_RNA
ENSMUSG00000024013	Fgd2	5.08956e-98	1.17575e-95	protein_coding
ENSMUSG00000045382	Cxcr4	1.81902e-96	4.15092e-94	protein_coding
ENSMUSG00000018914	Il3	2.99913e-95	6.76142e-93	protein_coding
ENSMUSG00000046805	Mpeg1	5.98213e-95	1.33259e-92	protein_coding
ENSMUSG00000000982	Ccl3	8.26234e-94	1.81888e-91	protein_coding
ENSMUSG00000092341	Malat1	1.3871e-93	3.01807e-91	lincRNA
ENSMUSG00000019850	Tnfaip3	7.97415e-93	1.71508e-90	protein_coding
ENSMUSG00000041782	Lad1	5.54853e-92	1.17982e-89	protein_coding
ENSMUSG00000022156	Gzme	8.96845e-92	1.88559e-89	protein_coding
ENSMUSG00000049124	Gm8186	1.8313e-91	3.80747e-89	pseudogene
ENSMUSG00000030067	Foxp1	2.10047e-91	4.31911e-89	protein_coding
ENSMUSG00000026616	Cr2	2.40881e-91	4.8993e-89	protein_coding
ENSMUSG00000057666	Gapdh	3.13969e-91	6.31718e-89	protein_coding
ENSMUSG00000032218	Ccnb2	4.24187e-91	8.44403e-89	protein_coding
ENSMUSG00000069114	Zbtb10	2.21739e-90	4.36756e-88	protein_coding
ENSMUSG00000034353	Ramp1	4.79734e-90	9.35081e-88	protein_coding
ENSMUSG00000052889	Prkcb	1.91351e-89	3.69129e-87	protein_coding
ENSMUSG00000021298	Gpr132	1.19842e-88	2.28825e-86	protein_coding
ENSMUSG00000069392	Rpl17-ps3	3.23685e-88	6.11798e-86	protein_coding
ENSMUSG00000030978	Rrm1	4.55935e-88	8.53145e-86	protein_coding
ENSMUSG00000025279	Dnase1l3	8.15257e-88	1.51041e-85	protein_coding
ENSMUSG00000074148	Bcl2a1d	9.4198e-88	1.72807e-85	protein_coding
ENSMUSG00000031004	Mki67	1.00885e-87	1.83278e-85	protein_coding
ENSMUSG00000030189	Csda	1.30543e-86	2.34878e-84	protein_coding
ENSMUSG00000092980	AC161246.1	3.31589e-86	5.90923e-84	misc_RNA
ENSMUSG00000054072	Iigp1	6.39619e-86	1.12911e-83	protein_coding
ENSMUSG00000009418	Nav1	6.63368e-86	1.16009e-83	protein_coding
ENSMUSG00000082585	Gm15387	8.37063e-86	1.45029e-83	pseudogene
ENSMUSG00000025964	Adam23	1.00283e-85	1.72156e-83	protein_coding
ENSMUSG00000020383	Il13	1.03446e-85	1.75971e-83	protein_coding
ENSMUSG00000030468	Siglecg	1.30311e-85	2.19674e-83	protein_coding
ENSMUSG00000034652	Cd300a	1.44598e-85	2.41582e-83	protein_coding
ENSMUSG00000018341	Il12rb2	2.07732e-85	3.43989e-83	protein_coding
ENSMUSG00000083097	Gm14494	7.79242e-85	1.27905e-82	pseudogene
ENSMUSG00000059256	Gzmd	8.01999e-85	1.30496e-82	protein_coding
ENSMUSG00000024521	Pmaip1	2.86348e-84	4.61908e-82	protein_coding
ENSMUSG00000093020	AC149222.1	1.49107e-83	2.38469e-81	misc_RNA
ENSMUSG00000027203	Dut	1.80988e-83	2.87004e-81	protein_coding
ENSMUSG00000090986	Gm17275	2.15991e-83	3.39632e-81	lincRNA
ENSMUSG00000056708	Ier5	6.22501e-83	9.70687e-81	protein_coding
ENSMUSG00000036478	Btg1	6.7504e-83	1.04391e-80	protein_coding
ENSMUSG00000026728	Vim	9.01328e-83	1.38243e-80	protein_coding
ENSMUSG00000018927	Ccl6	4.65892e-82	7.08762e-80	protein_coding
ENSMUSG00000022848	Dirc2	1.18584e-81	1.78947e-79	protein_coding
ENSMUSG00000036279	Zbtb20	2.30805e-81	3.45506e-79	protein_coding
ENSMUSG00000019942	Cdk1	2.70175e-81	4.01231e-79	protein_coding
ENSMUSG00000026249	Serpine2	5.09363e-81	7.50488e-79	protein_coding
ENSMUSG00000032294	Pkm2	1.12558e-80	1.64546e-78	protein_coding
ENSMUSG00000058728	Cd300c	2.94496e-80	4.27179e-78	protein_coding
ENSMUSG00000057098	Ebf1	3.42103e-80	4.92419e-78	protein_coding
ENSMUSG00000093205	AC122417.1	1.03594e-79	1.47974e-77	misc_RNA
ENSMUSG00000047604	Frat2	1.20961e-79	1.71471e-77	protein_coding
ENSMUSG00000086082	1700113A16Rik	1.24796e-79	1.75578e-77	lincRNA
ENSMUSG00000024843	Chka	1.60186e-79	2.23687e-77	protein_coding
ENSMUSG00000081603	Gm14681	4.93367e-79	6.83844e-77	pseudogene
ENSMUSG00000045827	Serpinb9	7.12508e-79	9.80327e-77	protein_coding
ENSMUSG00000051314	Ffar2	7.70877e-79	1.05289e-76	protein_coding
ENSMUSG00000086922	Gm13835	1.61813e-78	2.19409e-76	pseudogene
ENSMUSG00000032946	Rasgrp2	1.06459e-77	1.43313e-75	protein_coding
ENSMUSG00000060591	Ifitm2	1.08518e-77	1.45042e-75	protein_coding
ENSMUSG00000083287	Gm13502	1.86241e-77	2.47158e-75	pseudogene
ENSMUSG00000048878	Hexim1	2.7733e-77	3.6545e-75	protein_coding
ENSMUSG00000029333	Rasgef1b	7.06332e-77	9.24258e-75	protein_coding
ENSMUSG00000093043	AC159379.1	8.9401e-77	1.16172e-74	misc_RNA
ENSMUSG00000063427	Gm8017	1.01917e-76	1.31523e-74	pseudogene
ENSMUSG00000030867	Plk1	1.16868e-76	1.49783e-74	protein_coding
ENSMUSG00000027009	Itga4	2.73481e-76	3.4812e-74	protein_coding
ENSMUSG00000043323	Fbrsl1	3.10482e-76	3.9255e-74	protein_coding
ENSMUSG00000037731	BC013712	6.25595e-76	7.85647e-74	protein_coding
ENSMUSG00000093182	AC136021.1	6.97548e-76	8.70168e-74	misc_RNA
ENSMUSG00000062825	Actg1	3.45757e-75	4.28464e-73	protein_coding
ENSMUSG00000027496	Aurka	6.4528e-75	7.94374e-73	protein_coding
ENSMUSG00000093404	AC139376.1	1.06833e-74	1.30658e-72	miRNA
ENSMUSG00000029752	Asns	1.30515e-74	1.58584e-72	protein_coding
ENSMUSG00000017716	Birc5	1.60669e-74	1.93963e-72	protein_coding
ENSMUSG00000032515	Csrnp1	2.20134e-73	2.64048e-71	protein_coding
ENSMUSG00000031765	Mt1	7.27531e-73	8.67106e-71	protein_coding
ENSMUSG00000042599	Jhdm1d	9.69197e-73	1.14782e-70	protein_coding
ENSMUSG00000041431	Ccnb1	2.0257e-72	2.38396e-70	protein_coding
ENSMUSG00000003779	Kif20a	1.64565e-71	1.92459e-69	protein_coding
ENSMUSG00000078606	Gm4070	7.92042e-71	9.2054e-69	protein_coding
ENSMUSG00000033767	D930015E06Rik	9.36993e-71	1.08229e-68	protein_coding
ENSMUSG00000026107	Obfc2a	1.10415e-70	1.26754e-68	protein_coding
ENSMUSG00000044167	Foxo1	2.43724e-70	2.78084e-68	protein_coding
ENSMUSG00000024985	Tcf7l2	3.57841e-70	4.05813e-68	protein_coding
ENSMUSG00000027715	Ccna2	4.26096e-70	4.80308e-68	protein_coding
ENSMUSG00000078853	Igtp	1.11217e-69	1.24617e-67	protein_coding
ENSMUSG00000018143	Mafk	1.71762e-69	1.9131e-67	protein_coding
ENSMUSG00000029530	Ccr9	2.01994e-69	2.23651e-67	protein_coding
ENSMUSG00000045817	Zfp36l2	2.14908e-69	2.3655e-67	protein_coding
ENSMUSG00000056124	B4galt6	3.3834e-69	3.70235e-67	protein_coding
ENSMUSG00000031709	Tbc1d9	5.3113e-69	5.7782e-67	protein_coding
ENSMUSG00000003032	Klf4	5.80849e-69	6.28257e-67	protein_coding
ENSMUSG00000040061	Plcb2	8.02821e-69	8.63355e-67	protein_coding
ENSMUSG00000078921	Tgtp2	9.12688e-69	9.75899e-67	protein_coding
ENSMUSG00000030695	Aldoa	2.37755e-68	2.52777e-66	protein_coding
ENSMUSG00000025980	Hspd1	2.82311e-68	2.98452e-66	protein_coding
ENSMUSG00000050921	P2ry10	2.97837e-68	3.13097e-66	protein_coding
ENSMUSG00000021486	Prelid1	3.15691e-68	3.30012e-66	protein_coding
ENSMUSG00000048521	Cxcr6	4.3821e-68	4.55544e-66	protein_coding
ENSMUSG00000012889	Podnl1	5.12475e-68	5.29803e-66	protein_coding
ENSMUSG00000041538	H2-Ob	5.69213e-68	5.85226e-66	protein_coding
ENSMUSG00000092708	AC103368.1	1.14845e-67	1.17431e-65	misc_RNA
ENSMUSG00000022013	Dnajc15	1.18089e-67	1.20092e-65	protein_coding
ENSMUSG00000022744	Cldn25	1.20237e-67	1.21614e-65	protein_coding
ENSMUSG00000092775	AC147101.1	1.45895e-67	1.46773e-65	misc_RNA
ENSMUSG00000014599	Csf1	4.61625e-67	4.61921e-65	protein_coding
ENSMUSG00000063903	Klk1	4.71974e-67	4.69765e-65	protein_coding
ENSMUSG00000081999	Gm13461	7.48947e-67	7.41498e-65	pseudogene
ENSMUSG00000058818	Lilrb3	8.5704e-67	8.44049e-65	protein_coding
ENSMUSG00000001901	Kcnh6	9.46323e-67	9.27099e-65	protein_coding
ENSMUSG00000053977	Cd8a	9.6503e-67	9.40502e-65	protein_coding
ENSMUSG00000074788	5830416P10Rik	1.81005e-66	1.75491e-64	lincRNA
ENSMUSG00000001403	Ube2c	1.82903e-66	1.76416e-64	protein_coding
ENSMUSG00000014030	Pax5	1.93887e-66	1.86052e-64	protein_coding
ENSMUSG00000029875	AI836003	3.1991e-66	3.05416e-64	protein_coding
ENSMUSG00000004612	Nkg7	4.10245e-66	3.8967e-64	protein_coding
ENSMUSG00000000078	Klf6	4.49781e-66	4.25066e-64	protein_coding
ENSMUSG00000044424	Gm9493	5.19224e-66	4.88227e-64	protein_coding
ENSMUSG00000026034	Clk1	8.19442e-66	7.6667e-64	protein_coding
ENSMUSG00000054364	Rhob	1.83822e-65	1.71128e-63	protein_coding
ENSMUSG00000029076	Sdf4	1.85055e-65	1.71423e-63	protein_coding
ENSMUSG00000027469	Tpx2	2.24238e-65	2.06697e-63	protein_coding
ENSMUSG00000041954	Tnfrsf18	2.87109e-65	2.63352e-63	protein_coding
ENSMUSG00000028341	Nr4a3	3.84798e-65	3.51236e-63	protein_coding
ENSMUSG00000038304	Cd160	4.54412e-65	4.12765e-63	protein_coding
ENSMUSG00000002985	Apoe	7.77509e-65	7.02838e-63	protein_coding
ENSMUSG00000028525	Pde4b	1.7078e-64	1.53636e-62	protein_coding
ENSMUSG00000029304	Spp1	3.33114e-64	2.98241e-62	protein_coding
ENSMUSG00000070348	Ccnd1	1.53476e-63	1.36755e-61	protein_coding
ENSMUSG00000029135	Fosl2	1.64718e-63	1.46076e-61	protein_coding
ENSMUSG00000059743	Fdps	1.73464e-63	1.53106e-61	protein_coding
ENSMUSG00000058603	Rpl28-ps1	2.15916e-63	1.89682e-61	pseudogene
ENSMUSG00000026385	Dbi	2.48766e-63	2.17519e-61	protein_coding
ENSMUSG00000026458	Ppfia4	5.56749e-63	4.84553e-61	protein_coding
ENSMUSG00000015656	Hspa8	6.23316e-63	5.39977e-61	protein_coding
ENSMUSG00000039680	Mrps6	8.19661e-63	7.06797e-61	protein_coding
ENSMUSG00000032575	Manf	1.10898e-62	9.51895e-61	protein_coding
ENSMUSG00000047415	Gpr68	1.13562e-62	9.70305e-61	protein_coding
ENSMUSG00000002846	4930455C21Rik	1.29083e-62	1.09791e-60	protein_coding
ENSMUSG00000091227	Gm3755	1.83453e-62	1.55329e-60	protein_coding
ENSMUSG00000030539	Sema4b	4.70991e-62	3.9699e-60	protein_coding
ENSMUSG00000037902	Sirpa	6.30343e-62	5.28923e-60	protein_coding
ENSMUSG00000015312	Gadd45b	8.79792e-62	7.3494e-60	protein_coding
ENSMUSG00000085334	Gm12940	1.1168e-61	9.28778e-60	processed_transcript
ENSMUSG00000075289	Carns1	2.95545e-61	2.44701e-59	protein_coding
ENSMUSG00000092903	AC142212.1	3.35431e-61	2.76502e-59	misc_RNA
ENSMUSG00000004842	Pou1f1	3.45328e-61	2.83411e-59	protein_coding
ENSMUSG00000026830	Ermn	9.59763e-61	7.84239e-59	protein_coding
ENSMUSG00000046080	Clec9a	1.28083e-60	1.04204e-58	protein_coding
ENSMUSG00000089940	Gm4117	1.35621e-60	1.09859e-58	lincRNA
ENSMUSG00000032369	Plscr1	1.42601e-60	1.15015e-58	protein_coding
ENSMUSG00000034634	Ly6d	1.92413e-60	1.54525e-58	protein_coding
ENSMUSG00000030785	Cox6a2	6.39121e-60	5.11078e-58	protein_coding
ENSMUSG00000006445	Epha2	8.24245e-60	6.5631e-58	protein_coding
ENSMUSG00000022965	Ifngr2	1.04278e-59	8.26802e-58	protein_coding
ENSMUSG00000042842	Serpinb6b	1.14266e-59	9.0217e-58	protein_coding
ENSMUSG00000092942	AL591712.1	2.29856e-59	1.80509e-57	misc_RNA
ENSMUSG00000046223	Plaur	2.30557e-59	1.80509e-57	protein_coding
ENSMUSG00000030287	Itpr2	3.35536e-59	2.61606e-57	protein_coding
ENSMUSG00000052305	Hbb-b1	5.12098e-59	3.97609e-57	protein_coding
ENSMUSG00000006398	Cdc20	5.84167e-59	4.51692e-57	protein_coding
ENSMUSG00000021756	Il6st	1.23389e-58	9.50146e-57	protein_coding
ENSMUSG00000030751	Psma1	1.46382e-58	1.12258e-56	protein_coding
ENSMUSG00000031494	Cd209a	1.71396e-58	1.30904e-56	protein_coding
ENSMUSG00000001627	Ifrd1	3.74751e-58	2.85055e-56	protein_coding
ENSMUSG00000023175	Bsg	4.80277e-58	3.63844e-56	protein_coding
ENSMUSG00000032501	Trib1	5.2359e-58	3.95057e-56	protein_coding
ENSMUSG00000012443	Kif11	5.62657e-58	4.22828e-56	protein_coding
ENSMUSG00000046718	Bst2	8.36941e-58	6.26434e-56	protein_coding
ENSMUSG00000006715	Gmnn	1.01637e-57	7.577e-56	protein_coding
ENSMUSG00000068227	Il2rb	1.0556e-57	7.83828e-56	protein_coding
ENSMUSG00000087280	Gm17557	1.72852e-57	1.27842e-55	lincRNA
ENSMUSG00000028524	Sgip1	1.80597e-57	1.33045e-55	protein_coding
ENSMUSG00000024827	Gldc	2.61759e-57	1.9208e-55	protein_coding
ENSMUSG00000025283	Sat1	5.29524e-57	3.87049e-55	protein_coding
ENSMUSG00000034266	Batf	1.3341e-56	9.71346e-55	protein_coding
ENSMUSG00000041202	Pla2g2d	1.66939e-56	1.21076e-54	protein_coding
ENSMUSG00000036192	Rorb	1.71819e-56	1.24134e-54	protein_coding
ENSMUSG00000053522	Lgals7	3.52092e-56	2.53398e-54	protein_coding
ENSMUSG00000020089	Ppa1	4.59435e-56	3.29385e-54	protein_coding
ENSMUSG00000024640	Psat1	5.85549e-56	4.18198e-54	protein_coding
ENSMUSG00000082292	Gm12250	9.4348e-56	6.7127e-54	pseudogene
ENSMUSG00000043099	Hic1	1.0862e-55	7.69886e-54	protein_coding
ENSMUSG00000036181	Hist1h1c	1.74862e-55	1.23473e-53	protein_coding
ENSMUSG00000024425	Ndfip1	2.52734e-55	1.77788e-53	protein_coding
ENSMUSG00000015880	Ncapg	3.00027e-55	2.10266e-53	protein_coding
ENSMUSG00000092749	AC152826.1	5.84459e-55	4.08075e-53	misc_RNA
ENSMUSG00000040284	Gzmg	6.91863e-55	4.81269e-53	protein_coding
ENSMUSG00000032231	Anxa2	7.99893e-55	5.54356e-53	protein_coding
ENSMUSG00000042406	Atf4	8.72331e-55	6.02327e-53	protein_coding
ENSMUSG00000018362	Kpna2	1.013e-54	6.96882e-53	protein_coding
ENSMUSG00000092820	AC124472.1	1.02978e-54	7.05834e-53	misc_RNA
ENSMUSG00000073291	Gm10491	1.0663e-54	7.28198e-53	protein_coding
ENSMUSG00000072620	Slfn2	1.62563e-54	1.10614e-52	protein_coding
ENSMUSG00000032397	Tipin	2.87575e-54	1.94968e-52	protein_coding
ENSMUSG00000090378	Gm10925	3.79306e-54	2.5623e-52	protein_coding
ENSMUSG00000025134	Alyref	5.88751e-54	3.96285e-52	protein_coding
ENSMUSG00000028367	Txn1	5.92844e-54	3.97609e-52	protein_coding
ENSMUSG00000040957	Cables1	6.34787e-54	4.24219e-52	protein_coding
ENSMUSG00000023505	Cdca3	6.50468e-54	4.33152e-52	protein_coding
ENSMUSG00000033083	Tbc1d4	6.85613e-54	4.54936e-52	protein_coding
ENSMUSG00000026536	Mnda	7.37094e-54	4.87368e-52	protein_coding
ENSMUSG00000027306	Nusap1	1.92515e-53	1.26843e-51	protein_coding
ENSMUSG00000026989	Dapl1	2.01216e-53	1.32111e-51	protein_coding
ENSMUSG00000041355	Ssr2	2.21065e-53	1.44635e-51	protein_coding
ENSMUSG00000010097	Nxf1	2.26673e-53	1.47788e-51	protein_coding
ENSMUSG00000029373	Pf4	2.46806e-53	1.60356e-51	protein_coding
ENSMUSG00000040128	Pnrc1	3.33973e-53	2.16239e-51	protein_coding
ENSMUSG00000028312	Smc2	5.05141e-53	3.25938e-51	protein_coding
ENSMUSG00000025161	Slc16a3	5.22679e-53	3.36095e-51	protein_coding
ENSMUSG00000024966	Stip1	7.0371e-53	4.50953e-51	protein_coding
ENSMUSG00000030654	Arl6ip1	7.34171e-53	4.68867e-51	protein_coding
ENSMUSG00000092905	AC122537.1	1.03561e-52	6.59127e-51	misc_RNA
ENSMUSG00000026023	Cdk15	1.61907e-52	1.02698e-50	protein_coding
ENSMUSG00000024691	Fam111a	1.73145e-52	1.09456e-50	protein_coding
ENSMUSG00000000861	Bcl11a	2.93183e-52	1.84715e-50	protein_coding
ENSMUSG00000034926	Dhcr24	3.3665e-52	2.11389e-50	protein_coding
ENSMUSG00000020798	Spns3	4.96024e-52	3.10421e-50	protein_coding
ENSMUSG00000031760	Mt3	5.97439e-52	3.72643e-50	protein_coding
ENSMUSG00000022462	Slc38a2	6.68685e-52	4.15696e-50	protein_coding
ENSMUSG00000026581	Sell	1.03019e-51	6.38311e-50	protein_coding
ENSMUSG00000027533	Fabp5	1.15213e-51	7.11508e-50	protein_coding
ENSMUSG00000079010	Gm11032	1.234e-51	7.59558e-50	protein_coding
ENSMUSG00000026622	Nek2	1.33205e-51	8.17222e-50	protein_coding
ENSMUSG00000080746	Rpsa-ps12	1.39114e-51	8.50689e-50	pseudogene
ENSMUSG00000026104	Stat1	1.72166e-51	1.04937e-49	protein_coding
ENSMUSG00000003283	Hck	1.7893e-51	1.08706e-49	protein_coding
ENSMUSG00000036781	Rps27l	2.12023e-51	1.28394e-49	protein_coding
ENSMUSG00000028044	Cks1b	2.38093e-51	1.43716e-49	protein_coding
ENSMUSG00000063611	Gm10134	2.47497e-51	1.48912e-49	protein_coding
ENSMUSG00000007872	Id3	2.99608e-51	1.79688e-49	protein_coding
ENSMUSG00000000563	Atp5f1	3.4482e-51	2.06143e-49	protein_coding
ENSMUSG00000004952	Rasa4	3.6975e-51	2.20342e-49	protein_coding
ENSMUSG00000020333	Acsl6	4.26081e-51	2.53106e-49	protein_coding
ENSMUSG00000033307	Mif	4.61092e-51	2.73037e-49	protein_coding
ENSMUSG00000009292	Trpm2	4.77353e-51	2.81774e-49	protein_coding
ENSMUSG00000085891	Gm14634	4.92242e-51	2.89649e-49	lincRNA
ENSMUSG00000042622	Maff	1.0483e-50	6.14917e-49	protein_coding
ENSMUSG00000037313	Tacc3	1.25622e-50	7.34576e-49	protein_coding
ENSMUSG00000058579	Cela2a	1.4179e-50	8.26532e-49	protein_coding
ENSMUSG00000025163	Cd7	2.24759e-50	1.30611e-48	protein_coding
ENSMUSG00000000028	Cdc45	3.01737e-50	1.74802e-48	protein_coding
ENSMUSG00000053398	Phgdh	3.50103e-50	2.02195e-48	protein_coding
ENSMUSG00000031770	Herpud1	3.55476e-50	2.04667e-48	protein_coding
ENSMUSG00000026158	Ogfrl1	4.15196e-50	2.38318e-48	protein_coding
ENSMUSG00000051344	Plekhm3	4.49756e-50	2.57365e-48	protein_coding
ENSMUSG00000031633	Slc25a4	5.31787e-50	3.03378e-48	protein_coding
ENSMUSG00000068129	Cst7	5.36898e-50	3.05363e-48	protein_coding
ENSMUSG00000029822	Osbpl3	5.43274e-50	3.08053e-48	protein_coding
ENSMUSG00000092771	AC149593.1	5.95189e-50	3.36471e-48	misc_RNA
ENSMUSG00000023004	Tuba1b	9.07292e-50	5.11363e-48	protein_coding
ENSMUSG00000034708	Grn	9.9948e-50	5.6163e-48	protein_coding
ENSMUSG00000016559	H3f3b	1.75033e-49	9.80606e-48	protein_coding
ENSMUSG00000031453	Rasa3	1.91534e-49	1.06985e-47	protein_coding
ENSMUSG00000026285	Pdcd1	2.15143e-49	1.19513e-47	protein_coding
ENSMUSG00000081094	Rpl19-ps11	2.15241e-49	1.19513e-47	pseudogene
ENSMUSG00000034445	Cybasc3	2.53446e-49	1.4031e-47	protein_coding
ENSMUSG00000026548	Slamf9	2.69937e-49	1.48999e-47	protein_coding
ENSMUSG00000091944	Gm17517	2.86794e-49	1.57838e-47	lincRNA
ENSMUSG00000020897	Aurkb	3.89587e-49	2.13782e-47	protein_coding
ENSMUSG00000021025	Nfkbia	6.28298e-49	3.43763e-47	protein_coding
ENSMUSG00000092798	AL627204.1	6.61563e-49	3.60908e-47	misc_RNA
ENSMUSG00000018446	C1qbp	9.59909e-49	5.22146e-47	protein_coding
ENSMUSG00000024066	Xdh	1.49342e-48	8.09997e-47	protein_coding
ENSMUSG00000030677	Kif22	1.73498e-48	9.38294e-47	protein_coding
ENSMUSG00000089417	snoU90	1.96691e-48	1.06066e-46	snoRNA
ENSMUSG00000093257	CT010471.1	3.40943e-48	1.83325e-46	miRNA
ENSMUSG00000028327	1300002K09Rik	3.71456e-48	1.9916e-46	protein_coding
ENSMUSG00000089762	Ier5l	6.59179e-48	3.52416e-46	protein_coding
ENSMUSG00000006728	Cdk4	1.03405e-47	5.51258e-46	protein_coding
ENSMUSG00000039304	Tnfsf10	1.07278e-47	5.7028e-46	protein_coding
ENSMUSG00000081214	Rpl35a-ps2	1.13947e-47	6.04014e-46	pseudogene
ENSMUSG00000025492	Ifitm3	1.36463e-47	7.21324e-46	protein_coding
ENSMUSG00000076437	2700094K13Rik	1.40382e-47	7.39954e-46	protein_coding
ENSMUSG00000038943	Prc1	1.45478e-47	7.64658e-46	protein_coding
ENSMUSG00000012483	Rpa3	1.50116e-47	7.86826e-46	protein_coding
ENSMUSG00000028266	Lmo4	1.85705e-47	9.70646e-46	protein_coding
ENSMUSG00000039783	Kmo	2.58905e-47	1.34948e-45	protein_coding
ENSMUSG00000092785	AL672076.1	2.78522e-47	1.44769e-45	misc_RNA
ENSMUSG00000021477	Ctsl	2.85899e-47	1.48192e-45	protein_coding
ENSMUSG00000026355	Mcm6	3.06935e-47	1.58656e-45	protein_coding
ENSMUSG00000045328	Cenpe	3.51031e-47	1.8095e-45	protein_coding
ENSMUSG00000029467	Atp2a2	3.80041e-47	1.95366e-45	protein_coding
ENSMUSG00000022385	Gtse1	4.4901e-47	2.30188e-45	protein_coding
ENSMUSG00000029447	Cct6a	5.06931e-47	2.59172e-45	protein_coding
ENSMUSG00000032420	Nt5e	5.82206e-47	2.96846e-45	protein_coding
ENSMUSG00000052560	Cpne8	1.75281e-46	8.91267e-45	protein_coding
ENSMUSG00000029777	Gars	1.80376e-46	9.14685e-45	protein_coding
ENSMUSG00000076431	Sox4	1.95899e-46	9.90717e-45	protein_coding
ENSMUSG00000066621	Tecpr1	3.4869e-46	1.75868e-44	protein_coding
ENSMUSG00000059486	Kbtbd2	4.21256e-46	2.11897e-44	protein_coding
ENSMUSG00000029062	Cdk11b	4.2892e-46	2.15173e-44	protein_coding
ENSMUSG00000020048	Hsp90b1	4.35684e-46	2.17982e-44	protein_coding
ENSMUSG00000073527	Gm10529	1.03723e-45	5.17565e-44	pseudogene
ENSMUSG00000031925	Maml2	1.06216e-45	5.28593e-44	protein_coding
ENSMUSG00000015441	Gzmf	1.1576e-45	5.74565e-44	protein_coding
ENSMUSG00000079553	Kifc1	1.34438e-45	6.65506e-44	protein_coding
ENSMUSG00000022742	Cpox	1.91729e-45	9.46604e-44	protein_coding
ENSMUSG00000028837	Psmb2	2.9565e-45	1.45584e-43	protein_coding
ENSMUSG00000033004	Mycbp2	4.07837e-45	2.003e-43	protein_coding
ENSMUSG00000030579	Tyrobp	4.84842e-45	2.37496e-43	protein_coding
ENSMUSG00000046027	Stard5	7.71185e-45	3.76773e-43	protein_coding
ENSMUSG00000028639	Ybx1	7.85974e-45	3.82999e-43	protein_coding
ENSMUSG00000070495	Ctcfl	9.06037e-45	4.40357e-43	protein_coding
ENSMUSG00000053617	Sh3pxd2a	9.58665e-45	4.64729e-43	protein_coding
ENSMUSG00000020402	Vdac1	1.08975e-44	5.2691e-43	protein_coding
ENSMUSG00000032534	Cep63	1.27336e-44	6.14103e-43	protein_coding
ENSMUSG00000040253	Gbp7	1.30702e-44	6.2791e-43	protein_coding
ENSMUSG00000032011	Thy1	1.30871e-44	6.2791e-43	protein_coding
ENSMUSG00000058838	Rps27a-ps2	1.41312e-44	6.76274e-43	protein_coding
ENSMUSG00000025289	Prdx4	1.42714e-44	6.8124e-43	protein_coding
ENSMUSG00000024910	Ctsw	1.49701e-44	7.12777e-43	protein_coding
ENSMUSG00000024989	Cep55	1.53729e-44	7.30094e-43	protein_coding
ENSMUSG00000029430	Ran	1.66004e-44	7.86394e-43	protein_coding
ENSMUSG00000018770	Atp5g3	1.74041e-44	8.22387e-43	protein_coding
ENSMUSG00000073838	Tufm	1.82056e-44	8.58093e-43	protein_coding
ENSMUSG00000007880	Arid1a	1.86454e-44	8.76614e-43	protein_coding
ENSMUSG00000032786	Alas1	2.20303e-44	1.03316e-42	protein_coding
ENSMUSG00000083061	Gm12191	2.875e-44	1.34492e-42	pseudogene
ENSMUSG00000018965	Ywhah	4.7268e-44	2.20568e-42	protein_coding
ENSMUSG00000080893	Gm15920	9.79147e-44	4.55766e-42	pseudogene
ENSMUSG00000029602	Rasal1	9.91939e-44	4.60575e-42	protein_coding
ENSMUSG00000020914	Top2a	1.10214e-43	5.10476e-42	protein_coding
ENSMUSG00000024378	Stard4	1.25137e-43	5.78162e-42	protein_coding
ENSMUSG00000027398	Il1b	1.25904e-43	5.80276e-42	protein_coding
ENSMUSG00000029910	Mad2l1	1.30608e-43	6.00475e-42	protein_coding
ENSMUSG00000002068	Ccne1	1.95329e-43	8.95834e-42	protein_coding
ENSMUSG00000020326	Ccng1	1.97944e-43	9.05606e-42	protein_coding
ENSMUSG00000069045	Ddx3y	2.31634e-43	1.05716e-41	protein_coding
ENSMUSG00000001525	Tubb5	2.37103e-43	1.07948e-41	protein_coding
ENSMUSG00000040297	AI848100	2.46067e-43	1.11757e-41	protein_coding
ENSMUSG00000037573	Tob1	2.68287e-43	1.21554e-41	protein_coding
ENSMUSG00000001467	Cyp51	2.91051e-43	1.31549e-41	protein_coding
ENSMUSG00000046434	Hnrnpa1	3.02187e-43	1.36254e-41	protein_coding
ENSMUSG00000038482	Tfdp1	3.72969e-43	1.67764e-41	protein_coding
ENSMUSG00000022048	Dpysl2	4.04881e-43	1.81682e-41	protein_coding
ENSMUSG00000035953	Tmem55b	4.14264e-43	1.85157e-41	protein_coding
ENSMUSG00000001444	Tbx21	4.14604e-43	1.85157e-41	protein_coding
ENSMUSG00000005410	Mcm5	5.61856e-43	2.5032e-41	protein_coding
ENSMUSG00000054263	Lifr	9.12472e-43	4.05562e-41	protein_coding
ENSMUSG00000064360	mt-Nd3	1.05142e-42	4.66211e-41	protein_coding
ENSMUSG00000028851	Nudc	1.17968e-42	5.2185e-41	protein_coding
ENSMUSG00000037944	Ccr7	1.20594e-42	5.32208e-41	protein_coding
ENSMUSG00000054702	Ap1s3	1.46821e-42	6.46428e-41	protein_coding
ENSMUSG00000001750	Tcirg1	1.5828e-42	6.95241e-41	protein_coding
ENSMUSG00000057113	Npm1	1.70281e-42	7.46206e-41	protein_coding
ENSMUSG00000022895	Ets2	2.24177e-42	9.80092e-41	protein_coding
ENSMUSG00000058665	En1	2.90495e-42	1.26707e-40	protein_coding
ENSMUSG00000003206	Ebi3	4.76223e-42	2.07235e-40	protein_coding
ENSMUSG00000093201	AC153589.1	6.05656e-42	2.6254e-40	misc_RNA
ENSMUSG00000021792	5730469M10Rik	6.0612e-42	2.6254e-40	protein_coding
ENSMUSG00000027514	Zbp1	7.81244e-42	3.37613e-40	protein_coding
ENSMUSG00000021116	Eif2s1	8.48237e-42	3.65719e-40	protein_coding
ENSMUSG00000078771	Evi2a	9.51263e-42	4.09196e-40	protein_coding
ENSMUSG00000002984	Tomm40	1.14727e-41	4.92377e-40	protein_coding
ENSMUSG00000064363	mt-Nd4	1.21784e-41	5.21471e-40	protein_coding
ENSMUSG00000040511	Pvr	1.22961e-41	5.25306e-40	protein_coding
ENSMUSG00000030144	Clec4d	1.37524e-41	5.86186e-40	protein_coding
ENSMUSG00000040350	Trim7	1.5209e-41	6.46796e-40	protein_coding
ENSMUSG00000026683	Nuf2	1.63961e-41	6.95702e-40	protein_coding
ENSMUSG00000031373	Car5b	1.71482e-41	7.25964e-40	protein_coding
ENSMUSG00000037544	Dlgap5	1.81228e-41	7.65495e-40	protein_coding
ENSMUSG00000036768	Kif15	1.89253e-41	7.9759e-40	protein_coding
ENSMUSG00000030653	Pde2a	1.98738e-41	8.35683e-40	protein_coding
ENSMUSG00000001228	Uhrf1	2.17472e-41	9.12408e-40	protein_coding
ENSMUSG00000015143	Actn1	2.31027e-41	9.67109e-40	protein_coding
ENSMUSG00000036606	Plxnb2	2.38265e-41	9.95182e-40	protein_coding
ENSMUSG00000024056	Ndc80	2.44147e-41	1.01748e-39	protein_coding
ENSMUSG00000027331	D2Ertd750e	2.4695e-41	1.02687e-39	protein_coding
ENSMUSG00000072082	Ccnf	2.65906e-41	1.10325e-39	protein_coding
ENSMUSG00000001666	Ddt	2.82583e-41	1.16984e-39	protein_coding
ENSMUSG00000013701	Timm23	2.90414e-41	1.19961e-39	protein_coding
ENSMUSG00000037166	Ppp1r14a	3.10419e-41	1.27758e-39	protein_coding
ENSMUSG00000021226	Acot2	3.10656e-41	1.27758e-39	protein_coding
ENSMUSG00000029477	Morn3	3.35538e-41	1.37688e-39	protein_coding
ENSMUSG00000001833	Sept7	3.65662e-41	1.49722e-39	protein_coding
ENSMUSG00000029038	Ssu72	4.28237e-41	1.7496e-39	protein_coding
ENSMUSG00000022126	Irg1	4.45587e-41	1.81652e-39	protein_coding
ENSMUSG00000028678	Kif2c	6.10747e-41	2.48441e-39	protein_coding
ENSMUSG00000022769	Sdf2l1	6.24894e-41	2.53645e-39	protein_coding
ENSMUSG00000064358	mt-Co3	6.67914e-41	2.7052e-39	protein_coding
ENSMUSG00000028873	Cdca8	6.92166e-41	2.79737e-39	protein_coding
ENSMUSG00000047407	Tgif1	7.14444e-41	2.88118e-39	protein_coding
ENSMUSG00000075602	Ly6a	9.2421e-41	3.7191e-39	protein_coding
ENSMUSG00000046879	Irgm1	1.03993e-40	4.1758e-39	protein_coding
ENSMUSG00000064208	Gm10145	1.25708e-40	5.03693e-39	pseudogene
ENSMUSG00000028885	Smpdl3b	1.38005e-40	5.51782e-39	protein_coding
ENSMUSG00000020297	Nsg2	1.55119e-40	6.18887e-39	protein_coding
ENSMUSG00000073409	H2-Q6	2.08137e-40	8.2865e-39	protein_coding
ENSMUSG00000041859	Mcm3	3.67495e-40	1.45999e-38	protein_coding
ENSMUSG00000025278	Flnb	3.68865e-40	1.46043e-38	protein_coding
ENSMUSG00000051506	Wdfy4	3.69166e-40	1.46043e-38	protein_coding
ENSMUSG00000032383	Ppib	3.8419e-40	1.51666e-38	protein_coding
ENSMUSG00000026576	Atp1b1	4.0996e-40	1.61498e-38	protein_coding
ENSMUSG00000040938	Slc16a11	4.53181e-40	1.78149e-38	protein_coding
ENSMUSG00000021252	0610007P14Rik	5.45754e-40	2.14091e-38	protein_coding
ENSMUSG00000014226	Cacybp	7.25606e-40	2.84049e-38	protein_coding
ENSMUSG00000024335	Brd2	7.34686e-40	2.87003e-38	protein_coding
ENSMUSG00000082423	Gm15148	7.99819e-40	3.11796e-38	pseudogene
ENSMUSG00000026234	Ncl	8.22862e-40	3.20112e-38	protein_coding
ENSMUSG00000064354	mt-Co2	8.66198e-40	3.36272e-38	protein_coding
ENSMUSG00000020788	Atp2a3	1.02344e-39	3.96492e-38	protein_coding
ENSMUSG00000026750	Psmb7	1.22637e-39	4.74127e-38	protein_coding
ENSMUSG00000028832	Stmn1	1.47851e-39	5.70432e-38	protein_coding
ENSMUSG00000034906	Ncaph	1.52299e-39	5.86384e-38	protein_coding
ENSMUSG00000036908	Unc93b1	1.5685e-39	6.02665e-38	protein_coding
ENSMUSG00000064357	mt-Atp6	1.60449e-39	6.15229e-38	protein_coding
ENSMUSG00000032330	Cox7a2	1.87517e-39	7.17549e-38	protein_coding
ENSMUSG00000080134	Gm17516	1.90918e-39	7.29071e-38	lincRNA
ENSMUSG00000092860	CR956641.1	2.01567e-39	7.6817e-38	misc_RNA
ENSMUSG00000061232	H2-K1	2.07172e-39	7.87929e-38	protein_coding
ENSMUSG00000027962	Vcam1	2.30949e-39	8.76575e-38	protein_coding
ENSMUSG00000021200	Asb2	2.73039e-39	1.03423e-37	protein_coding
ENSMUSG00000007659	Bcl2l1	2.9773e-39	1.12548e-37	protein_coding
ENSMUSG00000073422	H2-Ke6	3.47299e-39	1.31021e-37	protein_coding
ENSMUSG00000020941	Map3k14	4.16627e-39	1.5686e-37	protein_coding
ENSMUSG00000021707	Dhfr	5.28817e-39	1.98699e-37	protein_coding
ENSMUSG00000024725	Ostf1	5.41863e-39	2.03193e-37	protein_coding
ENSMUSG00000064370	mt-Cytb	5.68014e-39	2.12573e-37	protein_coding
